# Supplementary material
Source: PubMed Central journal article supplement (PMC1820716)

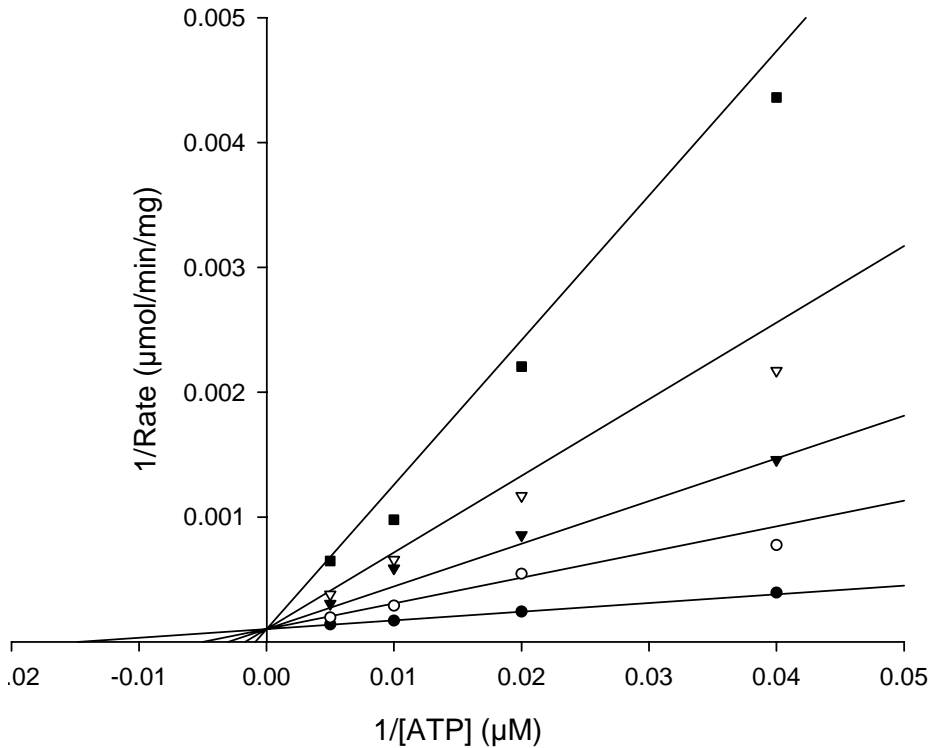

Supplement: pnas_0608798104_1.pdf [file pnas_0608798104_1.pdf]
